# Supplementary material for: Bioprospecting Beneficial Endophytic Bacterial Communities Associated With Rosmarinus Officinalis for Alleviating Plant Productivity
Source: Research Square preprint supplement (doi:10.21203/rs.3.rs-168788/v1), 2021-02-04
Supplement: Supplementary file 1 [file 77cef21594e6929dc1d8001c.docx]

Table S1. Geographical coordinates and climatic characteristics of *Rosemarinus officinalis* growing locations used for sample collection at Himachal Pradesh

| **Location** | **Sampling site** | **Geographic coordinate** | **Altitude (masl)*** | **Climatic classification** |
| --- | --- | --- | --- | --- |
| Kangra | Dharamkot | 32.2475° N,76.3257° E | 2100 | Mid-hills sub humid |
| Palampur | 32.1109°N, 76.5363° E | 1472 | Mid-hills sub humid |
| Kullu | Bhuntar | 31.8843°N, 77.1456° E | 1050 | Mid-hills sub humid |
| Sultanpur | 31.9579°N, 77.1095° E | 1278 | Mid-hills sub humid |
| Solan | Nauni | 30.8600°N, 77.1730° E | 1275 | Mid-hills sub humid |
| Kandaghat | 30.9702°N, 77.1054° E | 1425 | Mid-hills sub humid |
| Sirmour | Neri Kotli | 30.8871°N,77.3468°E | 1520 | Mid-hills sub humid |
| Habban | 30.9090°N, 77.3253° E | 2063 | High-hills temperate wet |

* masl**:** meter above sea level

Table S2. Morpho-biochemical characterization of endophytic bacteria of *R. officinalis*.

| **Endophytes** | **Gram’s reaction** | **Cell shape** | **Endospore formation** | **Indole** | **Methyl red** | **VP** | **Citrate utilization** | **H2S** | **Catalase** | **Nitrate** | **Oxidase** | **Gelatin hydrolysis** | **Sugars fermentation** | | | | | |
| --- | --- | --- | --- | --- | --- | --- | --- | --- | --- | --- | --- | --- | --- | --- | --- | --- | --- | --- |
| **Dextrose** | | **Lactose** | | **Sucrose** | |
| **Color change** | **Gas production** | **Color change** | **Gas production** | **Color change** | **Gas production** |
| KA1 | **-** | Cocci | - | + | + | + | - | - | + | + | + | - | + | - | + | - | + | - |
| KA2 | **+** | Rods | + | - | - | - | + | - | + | + | + | - | - | - | - | - | + | - |
| KA6 | **+** | Rods | + | + | - | - | + | - | + | + | - | - | + | - | - | - | - | - |
| KA7 | **-** | Coccobacilli | - | - | + | + | - | - | + | + | + | - | + | - | - | - | + | - |
| KA8 | **-** | Cocci | - | - | + | - | + | - | + | - | + | - | - | - | - | - | - | - |
| KA9 | **+** | Coccobacilli | + | - | - | + | + | - | + | + | + | - | + | - | - | - | - | - |
| KA10 | **+** | Rods | + | + | + | + | - | - | + | + | + | - | + | - | - | - | + | - |
| KA11 | **-** | Rods | - | - | - | - | + | - | + | - | + | + | + | - | - | - | + | - |
| KA13 | **+** | Single | + | - | + | + | + | - | + | - | - | - | + | + | - | - | + | + |
| KA14 | **-** | Coccobacilli | - | - | + | - | + | + | + | + | - | + | + | - | - | - | + | - |
| KA16 | **+** | Coccobacilli | - | + | + | - | + | - | + | - | - | - | + | - | - | - | + | - |
| KA19 | **+** | Coccobacilli | + | - | + | - | - | - | + | - | + | - | + | - | - | - | - | - |
| KA26 | **+** | Coccobacilli | + | - | + | - | - | + | + | + | + | + | + | - | - | - | + | + |
| KA29 | **-** | Cocci | - | - | + | - | + | - | + | + | + | - | - | - | - | - | - | - |
| KA30 | **-** | Coccobacilli | - | + | - | + | + | + | + | - | - | - | - | - | - | - | - | - |
| KA31 | **+** | Coccobacilli | + | - | + | + | - | + | + | + | - | + | + | - | - | - | + | - |
| KA33 | **-** | Cocci | - | + | + | - | + | - | + | + | + | - | + | - | - | - | - | - |
| KU2 | **-** | Rods | - | - | - | - | + | - | + | + | + | - | - | - | + | - | + | - |
| KU4 | **+** | Coccobacilli | + | - | - | - | - | - | + | + | + | - | - | - | - | - | - | - |
| KU5 | **-** | Rods | - | - | + | + | - | - | + | + | + | - | - | - | - | - | - | - |
| KU13 | **-** | Rods | - | - | + | + | - | - | + | + | - | - | + | - | - | - | + | - |
| KU14 | **-** | Rods | - | - | - | - | - | - | + | + | - | - | + | - | - | - | + | - |
| KU16 | **+** | Coccobacilli | + | - | + | - | - | - | + | - | - | - | + | - | + | - | - | - |
| KU18 | **-** | Cocci | - | - | - | - | - | - | + | + | + | - | + | - | - | - | - | - |
| KU20 | **+** | Cocci | + | + | + | + | - | - | - | + | + | + | - | - | - | - | + | - |
| KU21 | **+** | Rods | + | - | - | + | + | - | + | + | + | - | - | - | - | - | - | - |
| KU25 | **-** | Cocci | + | - | + | - | - | - | - | + | + | - | - | - | - | - | - | - |
| SI12 | **-** | Rods | - | - | + | - | + | - | + | + | + | + | + | - | - | - | + | - |
| SI13 | **+** | Rods | + | + | + | - | + | - | + | + | - | - | + | - | - | - | - | - |
| SI14 | + | Coccobacilli | + | - | - | - | + | - | + | + | - | - | + | - | - | - | - | - |
| SO2 | **-** | Cocci | - | + | + | - | - | - | + | + | + | + | + | - | - | - | - | - |
| SO3 | **-** | Cocci | - | + | + | - | - | - | + | + | + | - | + | - | - | - | - | - |
| SO4 | **+** | Coccobacilli | - | + | + | + | - | - | + | + | - | - | + | + | - | - | + | + |
| SO6 | **-** | Cocci | - | - | - | - | - | - | + | + | - | - | + | - | - | - | - | - |
| SO7 | **-** | Coccobacilli | - | + | - | - | + | - | + | + | + | + | - | - | - | - | - | - |
| SO8 | **-** | Cocci | - | - | - | + | + | - | + | + | - | - | + | + | + | + | - | - |
| SO12 | **-** | Cocci | - | - | - | + | - | - | + | - | + | - | - | - | - | - | + | - |
| SO13 | **-** | Cocci | - | - | + | + | + | - | + | + | - | - | + | + | + | + | + | + |
| SO20 | **-** | Cocci | - | - | - | + | - | - | + | + | - | - | + | - | - | - | - |  |
| SO21 | **-** | Coccobacilli | - | - | - | + | + | - | + | + | + | + | + | + | + | - | + | - |
| SO22 | **+** | Rods | + | - | + | - | - | - | + | + | + | - | + | - | - | - | - | - |
| SO23 | **-** | Coccobacilli | - | - | + | - | + | - | + | + | + | - | + | - | - | - | - | - |
